# Supplementary material
Source: PubMed Central journal article supplement (PMC7641175)
Supplement: supp_8.3.E554_2020-0090-1-at.pdf [file supp_8.3.E554_2020-0090-1-at.pdf]

**Appendix 1 (as supplied by the authors):** Individual contamination scores for each trial and assessor during intubation, stratified by barrier group allocation.

|                 | Control   |           | Sheet     |           | Box       |           |
|-----------------|-----------|-----------|-----------|-----------|-----------|-----------|
| Assessor        | 1         | 2         | 1         | 2         | 1         | 2         |
| Location        |           |           |           |           |           |           |
| Right hand      | 2,3,3,4,4 | 1,2,2,2,3 | 3,4,4,4,4 | 3,3,3,4,4 | 2,4,4,4,4 | 3,3,3,4,4 |
| Left hand       | 2,3,3,3,4 | 1,3,3,4,4 | 4,4,4,4,4 | 2,3,3,4,4 | 2,4,4,4,4 | 3,4,4,4,4 |
| Right forearm   | 0,0,0,0,3 | 0,0,0,0,0 | 0,2,3,3,4 | 0,1,2,3,4 | 0,0,1,2,3 | 0,0,0,1,2 |
| Left forearm    | 0,0,2,2,4 | 0,0,1,3,4 | 2,3,3,4,4 | 1,1,2,2,4 | 0,0,0,1,2 | 0,0,1,2,3 |
| Right upper arm | 0,0,0,0,0 | 0,0,0,0,0 | 0,0,0,0,4 | 0,0,0,1,2 | 0,0,0,0,0 | 0,0,0,0,0 |
| Left upper arm  | 0,0,0,0,2 | 0,0,0,0,2 | 0,0,0,0,2 | 0,0,0,0,2 | 0,0,0,0,0 | 0,0,0,0,0 |
| Torso           | 0,0,0,1,1 | 0,0,0,1,1 | 1,1,2,2,2 | 1,1,1,2,2 | 0,0,0,0,0 | 0,0,0,0,0 |
| Head & neck     | 0,0,0,0,1 | 0,0,0,0,1 | 0,0,0,0,0 | 0,0,0,0,0 | 0,0,0,0,0 | 0,0,0,0,0 |
| Lower body      | 0,0,0,0,1 | 0,0,0,0,1 | 0,0,0,0,1 | 0,0,0,0,1 | 0,0,0,0,0 | 0,0,0,0,0 |

\*Note that all measurements except for the head represent a sum of independent score for front and back.
