# Supplementary material
Source: PubMed Central journal article supplement (PMC7641175)
Supplement: supp_8.3.E554_2020-0090-2-at.pdf [file supp_8.3.E554_2020-0090-2-at.pdf]

**Appendix 2 (as supplied by the authors):** Narrative participant comments of intubating conditions using the plastic sheet or plexiglass box compared to no barrier

**Barrier Device**

| <b>Subject</b> | <b>Plastic Sheet</b>                                                                                                                                                      | <b>Intubation Box</b>                                                                     |
|----------------|---------------------------------------------------------------------------------------------------------------------------------------------------------------------------|-------------------------------------------------------------------------------------------|
| <b>1</b>       | “Very awkward, more challenging to visualize video laryngoscope and manipulate endotracheal tube.”                                                                        | “Minimal limitation to space for withdrawing intubating stylet otherwise no limitations.” |
| <b>2</b>       | ‘Hardest to intubate, felt messy passing items under the drape.”                                                                                                          | “A little difficult to reach, easier than using plastic drape.”                           |
| <b>3</b>       | “Very difficult to see video laryngoscope.”                                                                                                                               | “No problems, easy to use but some glare from plexiglass on box.”                         |
| <b>4</b>       | “Sheet was very messy and difficult to see video laryngoscope screen. Drape often moved or bunched up during procedure which defeated its purpose and contaminated arms.” | “Much easier and smoother than drape.”                                                    |
| <b>5</b>       | “Difficult and messy. Hard to see airway and drape seemed to move around a lot.”                                                                                          | “Could see better but slightly awkward intubation.”                                       |

\*All comments transcribed verbatim from participant comments
